# Supplementary material for: A single-atom iron catalyst on hierarchical N-doped carbon for highly efficient oxygen reduction in Zn–air batteries
Source: Royal Society of Chemistry journal article supplement (doi:10.1039/d4ta03039g), 2024-01-01
Supplement: d4ta03039g1.pdf [file d4ta03039g1.pdf]

# Single-Atom Iron Catalyst on Hierarchical N-doped Carbon for Highly Efficient Oxygen Reduction in Zn-Air Battery

*Jun-Fei Gu<sup>a</sup>, Jichao Wang<sup>a</sup>, Qing Wu<sup>a</sup>, Caixia Wang<sup>\*b</sup>, Francis Verpoort<sup>\*a, c</sup>, Somboon Chaemchuen<sup>\*a, d</sup>*

<sup>a</sup> State Key Laboratory of Advanced Technology for Materials Synthesis and Processing, Wuhan University of Technology, 122 Luoshi Road, Wuhan 430070, P. R. China.

<sup>b</sup> School of Civil Engineering and Architecture, Wuhan University of Technology, 122 Luoshi Road, Wuhan 430070, P. R. China.

<sup>c</sup> Joint Institute of Chemical Research (FFMiEN), Peoples Friendship University of Russia (RUDN University), 6 Miklukho-Maklaya Str., 117198 Moscow, Russia.

<sup>d</sup> Department of Chemical Engineering, Faculty of Engineering, Mahidol University, Nakhon Pathom 73170, Thailand.

## Corresponding Authors:

\*E-mail for Dr. Caixia Wang: [caixia.wang@whut.edu.cn](mailto:caixia.wang@whut.edu.cn); \*E-mail for Prof. Dr. Francis Verpoort:

[francis@whut.edu.cn](mailto:francis@whut.edu.cn); \*E-mail for Dr. Somboon Chaemchuen: [sama\\_che@hotmail.com](mailto:sama_che@hotmail.com);

## Contents:

|                                      |                |
|--------------------------------------|----------------|
| <b>1. Experimental section .....</b> | <b>S2-S4</b>   |
| <b>2. Supplementary data.....</b>    | <b>S5-S11</b>  |
| <b>References.....</b>               | <b>S12-S13</b> |

## 1. Experimental section

### 1.1 Electrochemical measurements

All the electrochemical tests were performed on a CHI 760E electrochemical workstation (Shanghai Chenhua Instrument Factory, China) and coupled with a rotating-ring disc electrode (RRDE, Pine, AFMSRCE) in a three-electrode system. A glass carbon rotating disk electrode (RDE), a Hg/HgO electrode filled with 1 M KOH and Pt plate served as the working electrode (0.196 cm<sup>2</sup>), the reference electrode, and the counter electrode, respectively. All potentials in this work were referenced to the reversible hydrogen electrode (RHE). The homogeneous catalyst ink was prepared by dispersing 2.5 mg catalyst and 10  $\mu$ L Nafion (5%) into 0.5 mL aqueous isopropanol solution (V/V, 1:1) for 0.5 h sonication. Then 20  $\mu$ L of the catalyst ink was loaded onto the surface of RDE and dried at the room temperature. Before each measurement, the reference electrode was calibrated to the RHE in Ar saturated 0.1 M KOH electrolyte. Then, the pure O<sub>2</sub> was flowed into the cell for 30 minutes to achieve an O<sub>2</sub> saturated 0.1 M KOH electrolyte. Linear sweep voltammetry (LSV) tests were performed at rotating speeds from 400 to 2400 rpm at a sweep rate of 10 mV·s<sup>-1</sup> at room temperature. The cyclic voltammetry (CV) tests were conducted in Ar or oxygen saturated 0.1 M KOH at a scan rate of 20 mV·s<sup>-1</sup> at room temperature. In addition, the capacitive background of the carbon support was necessarily collected by testing the LSV at the same scan rate in an Ar saturated 0.1 M KOH electrolyte. The cyclic voltammetry (CV) measurement at different scan rates was performed to calculate the electrochemical double-layer capacitance ( $C_{dl}$ ),  $C_{dl} = j/v$ , where  $j$  (mA·cm<sup>-2</sup>) is the average value of current density at 1.054 V vs RHE and  $v$  is the scan rate (mV·s<sup>-1</sup>). The electrochemical surface area (ECSA) can be obtained from the equation:  $ECSA = C_{dl} \text{ of catalyst } / C_s$ . The specific capacitance ( $C_s$ ) value  $C_s = 40 \mu\text{F}\cdot\text{cm}^{-2}$  is adopted for the estimation of ECSA. The electron transfers number ( $n$ ) and kinetic current density ( $J_k$ ) were calculated from the Koutecky-Levich equation:

$$\frac{1}{J} = \frac{1}{J_L} + \frac{1}{J_k} = \frac{1}{B\omega^{0.5}} + \frac{1}{J_k} \quad (1)$$

$$B = 0.62nFC_0(D_0)^{2/3}\nu^{-1/6} \quad (2)$$

$J$  is the measured current density and  $\omega$  is the electrode rotating rate ( $\text{rad}\cdot\text{s}^{-1}$ ).  $J_L$  and  $J_k$  are the diffusion- and kinetic-limiting current densities, respectively.  $n$  is the transferred electron number,  $F$  is the Faraday constant ( $F = 96485 \text{ C}\cdot\text{mol}^{-1}$ ),  $C_0$  is the  $\text{O}_2$  concentration in the electrolyte ( $C_0 = 1.2 \times 10^{-3} \text{ mol}\cdot\text{L}^{-1}$ ),  $D_0$  is the diffusion coefficient of  $\text{O}_2$  ( $D_0 = 1.9 \times 10^{-5} \text{ cm}^2\cdot\text{s}^{-1}$ ), and  $\nu$  is the kinetic viscosity ( $\nu = 0.01 \text{ cm}^2\cdot\text{s}^{-1}$ ). The constant 0.62 is adopted when the rotation speed is expressed in  $\text{rad}\cdot\text{s}^{-1}$ .

The hydrogen peroxide ( $\text{H}_2\text{O}_2$ ) yield and transfer number ( $n$ ) were determined by the followed equations:

$$HO_2^- = 200 \frac{I_r/N}{I_d + I_r/N} \quad (3)$$

$$n = 4 \frac{I_d}{I_d + I_r/N} \quad (4)$$

where  $I_d$  and  $I_r$  are disk and ring currents, respectively.  $N$  is the ring current collection efficiency (37%).

The turnover frequency (TOF) of the catalysts were calculated based on the surface mole of the iron single atoms. The value of TOF was determined by the equation:

$$TOF = \frac{J_k \times S}{4N \times F} \quad (5)$$

where  $J_k$  indicated the kinetic current density at 0.9 V,  $S$  represented the specific area of RDE ( $0.196 \text{ cm}^2$ ), 4 is the number of electrons transferred during  $\text{O}_2$  reduction,  $N$  was the mole number of the iron single atom sites on the electrode obtained from the metal concentrations,  $F$  was the Faraday constant ( $96485 \text{ C}\cdot\text{mol}^{-1}$ ).

The mass activity of the catalysts was calculated by the following equation:

$$MA = \frac{J_k \times S}{m \times C} \quad (6)$$

where  $J_k$  indicated the kinetic current density at 0.9 V,  $S$  represented the specific area of RDE ( $0.196 \text{ cm}^2$ ),  $m$  was the mass of the catalysts loading on RDE,  $C$  indicated the metal concentration based on the results of ICP.

## 1.2 Zn-air battery tests

To construct the liquid ZABs, a polished zinc foil and carbon paper loaded with catalysts were worked as the anode and air cathode, respectively. The electrolyte was a 6 M KOH solution with 0.2 M  $\text{Zn}(\text{COOH})_2$ . The air cathode was prepared by dropping Fe-SA@NC/  $\text{RuO}_2$  (mass ratio, 1:1) or Pt/C-  $\text{RuO}_2$  (mass ratio, 1:1) on the carbon paper to achieve a catalyst loading of  $1 \text{ mg}\cdot\text{cm}^{-2}$  for rechargeable air electrode.

The solid-state ZABs were fabricated by a zinc foil as anode, Fe-SA@NC loaded carbon paper as air cathode, respectively. The Zn foil was polished by abrasive paper and washed with ethanol. The solid electrolyte was composed of polyvinyl alcohol (PVA), KOH and  $\text{Zn}(\text{COOH})_2$ . The mass loading of catalyst is  $2 \text{ mg}\cdot\text{cm}^{-2}$  for flexible solid rechargeable air electrode. The solid electrolyte was prepared as the following steps: PVA powder was added into 50 mL  $\text{H}_2\text{O}$  at  $90 \text{ }^\circ\text{C}$  and stirred for 30 minutes. When the solution turned into transparent gel, the mixture of 6 M KOH and 0.2 M  $\text{Zn}(\text{COOH})_2$  was added drop by drop. After being stirred for 30 minutes, the gel was evenly placed at the evaporating dish and refrigerated in the refrigerator for 24 h. Then the gel was taken out and thawed at room temperature.

## 2. Supplementary data

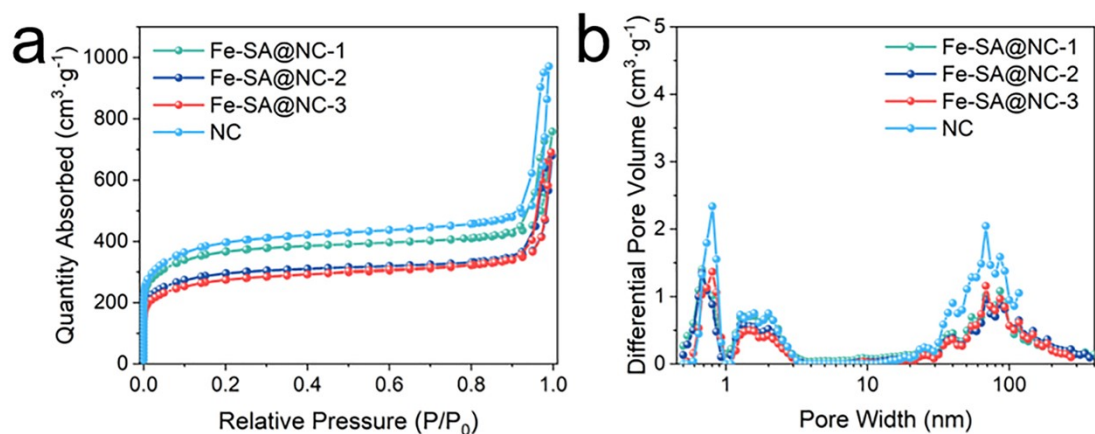

**Fig. S1.** (a)  $N_2$  adsorption-desorption isotherms, (b) Pore-size distribution curves of the catalysts.

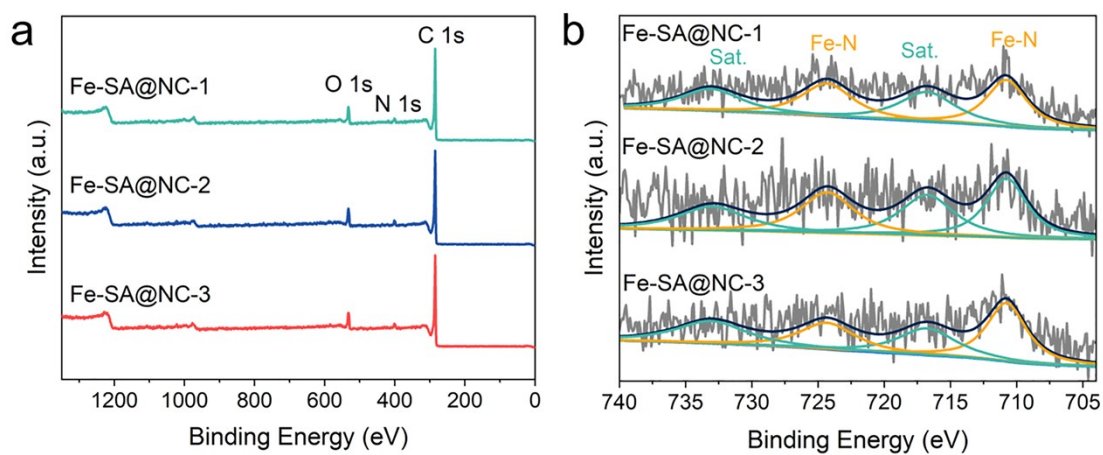

**Fig. S2.** (a) XPS survey of the Fe-SA@NC catalysts, (b) High-resolution of Fe 2p spectra of the catalysts.

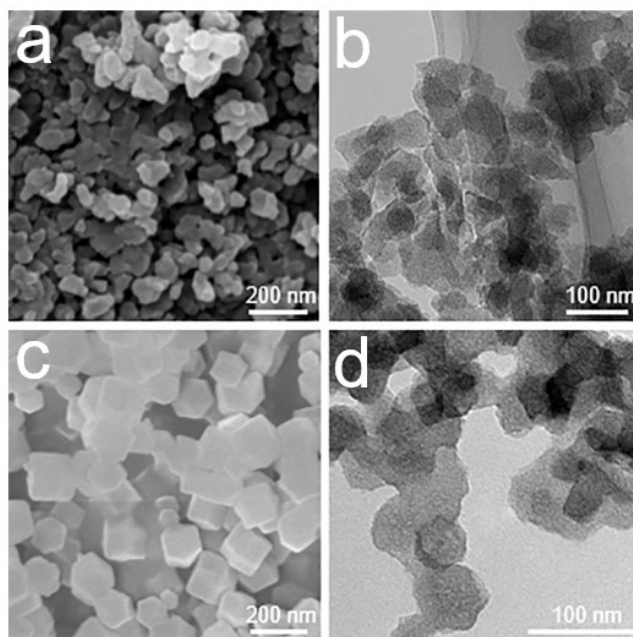

**Fig. S3.** (a) SEM and (b) TEM images of NC, (c) SEM and (d) TEM images of ZIF-8.

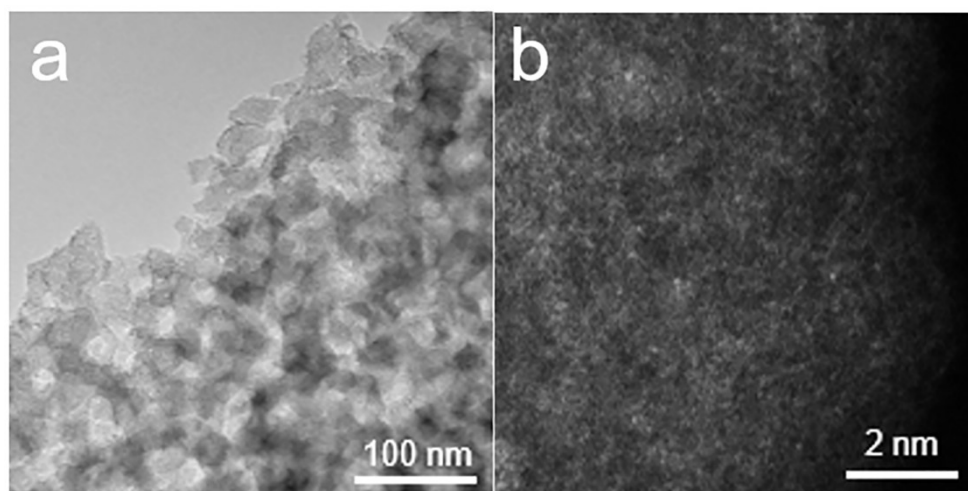

**Fig. S4.** (a) TEM image, (b) AC HAADF-STEM image of Fe-SA@NC-2.

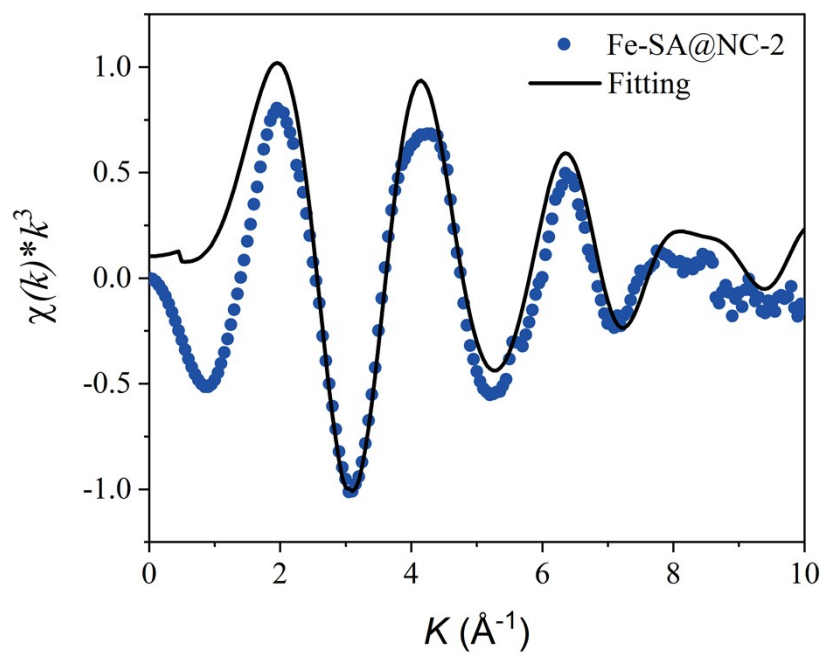

**Fig. S5.** Fe k-edge EXAFS and the fitting for Fe-SA@NC-2, shown in  $k^3$  weighted K-space.

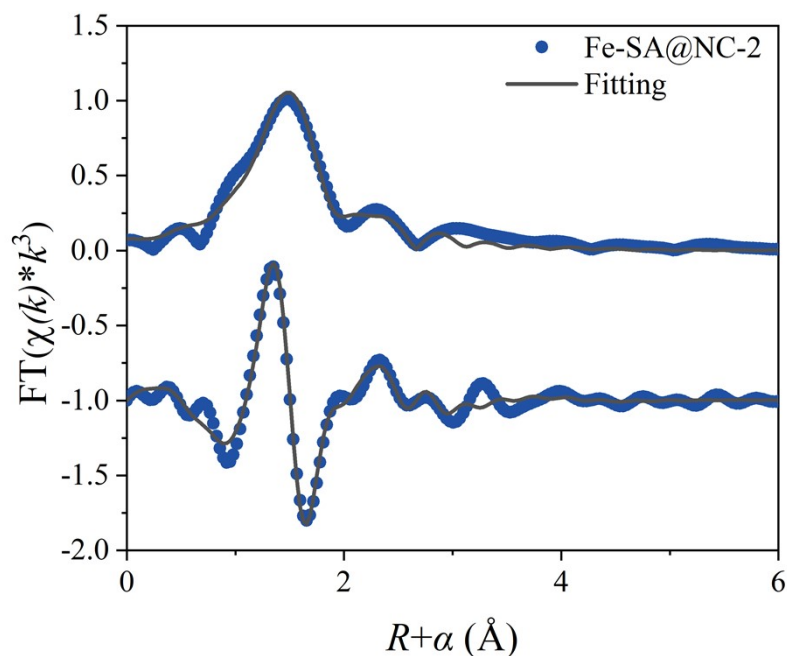

**Fig. S6.** Fe K-edge EXAFS and the fitting for Fe-SA@NC-2, shown in R-space. (FT magnitude and imaginary component) The data are  $k^3$  weighted and not phase-corrected.

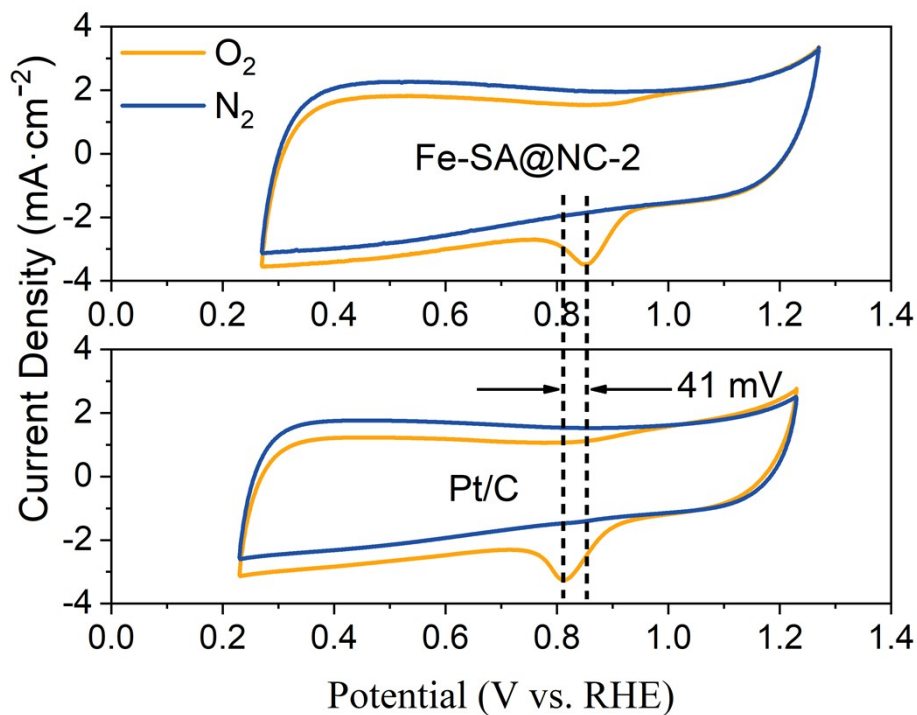

**Fig. S7.** CV plots of Fe-SA@NC-2 under Ar- and O<sub>2</sub>-saturated 0.1 M KOH medium.

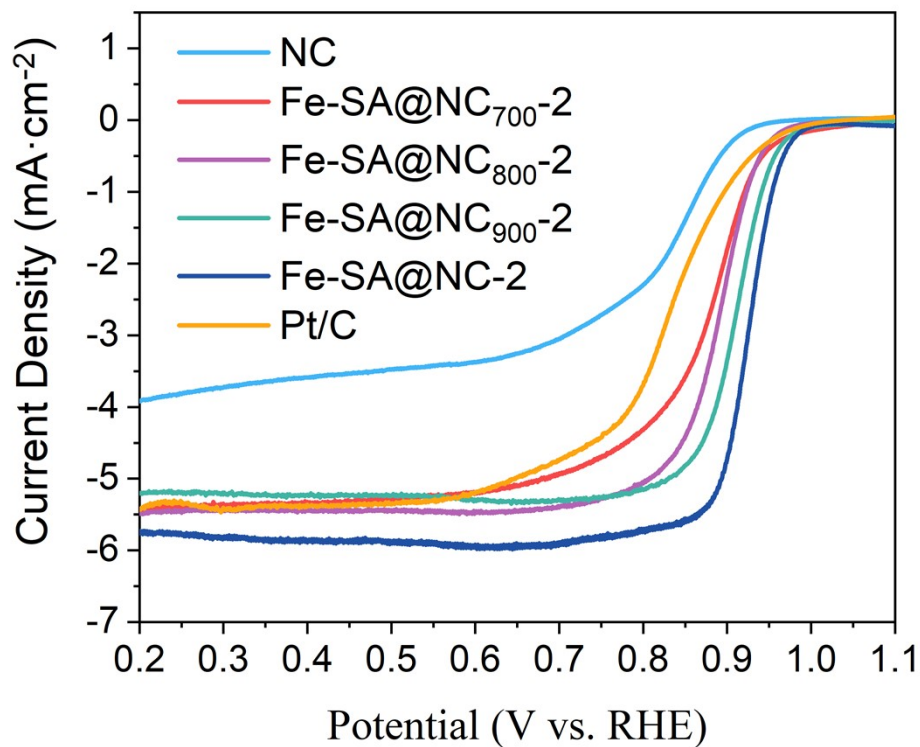

**Fig. S8.** LSV curves of Fe-SA@NC<sub>T</sub>-2 catalysts at a rotation rate of 1600 rpm under 10 mV·s<sup>-1</sup> (the NC for Fe-SA@NC-2 was 1000 °C as mentioned above).



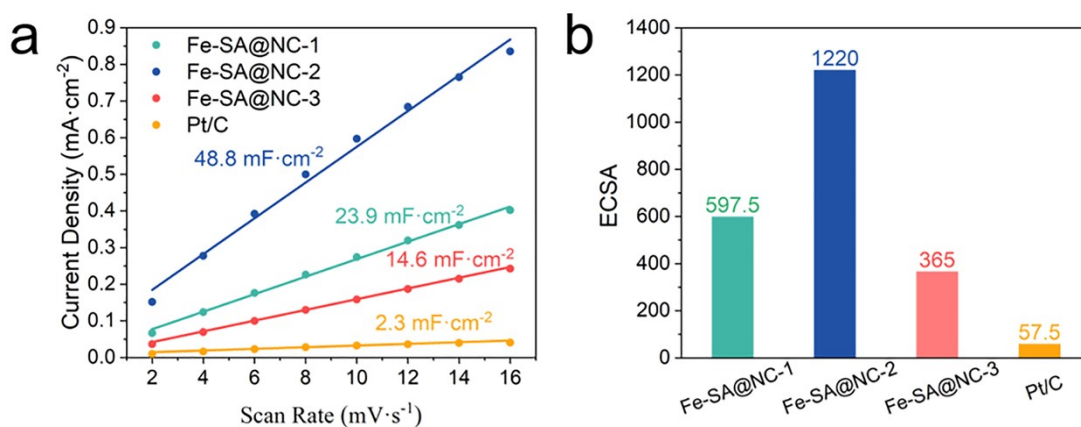

**Fig. S9.** (a) The double-layer capacitance ( $C_{dl}$ ), (b) electrochemical surface area (ECSA) of the catalysts.

**Table S1.** The BET surface area, Langmuir surface area, pore volume and pore size of the catalysts.

| Sample     | BET Surface Area<br>( $\text{m}^2\cdot\text{g}^{-1}$ ) | Langmuir Surface Area<br>( $\text{m}^2\cdot\text{g}^{-1}$ ) | Pore volume<br>( $\text{cm}^3\cdot\text{g}^{-1}$ ) | Average pore<br>size (nm) |
|------------|--------------------------------------------------------|-------------------------------------------------------------|----------------------------------------------------|---------------------------|
| Fe-SA@NC-1 | 1348                                                   | 1457                                                        | 0.55                                               | 1.18                      |
| Fe-SA@NC-2 | 1090                                                   | 1178                                                        | 0.45                                               | 1.16                      |
| Fe-SA@NC-3 | 1006                                                   | 987                                                         | 0.41                                               | 1.17                      |
| NC         | 1445                                                   | 1562                                                        | 0.60                                               | 1.19                      |

**Table S2.** Elemental analysis of Fe-SA@NC catalysts.

| Sample     | C (%) <sup>a</sup> | H (%) <sup>a</sup> | N (%) <sup>a</sup> | Fe (%) <sup>b</sup> |
|------------|--------------------|--------------------|--------------------|---------------------|
| Fe-SA@NC-1 | 68.85              | 1.61               | 3.34               | 0.66                |
| Fe-SA@NC-2 | 63.47              | 1.54               | 3.30               | 1.00                |
| Fe-SA@NC-3 | 65.86              | 1.58               | 3.46               | 1.31                |

<sup>a</sup> measured by CHNS/O Elemental Analyzer, <sup>b</sup> measured by ICP-OES.

**Table S3.** XPS elemental analysis of Fe-SA@NC catalysts.

| Sample     | Fe (atom%) | N (atom %) | C (atom %) |
|------------|------------|------------|------------|
| Fe-SA@NC-1 | 0.57       | 4.05       | 95.37      |
| Fe-SA@NC-2 | 0.68       | 4.74       | 94.58      |
| Fe-SA@NC-3 | 0.75       | 4.67       | 94.58      |

**Table S4.** Content of different N species of Fe-SA@NC catalysts analyzed by XPS.

| Sample     | Pyridinic-N (%) | Fe-N (%) | Pyrrolic-N (%) | Graphitic-N (%) | Oxidized-N (%) |
|------------|-----------------|----------|----------------|-----------------|----------------|
| Fe-SA@NC-1 | 22              | 22.8     | 27.2           | 10              | 18             |
| Fe-SA@NC-2 | 33.4            | 21.4     | 25             | 11.2            | 9              |
| Fe-SA@NC-3 | 31.5            | 25       | 23.4           | 10.8            | 9.3            |

**Table S5.** Structural parameters of samples obtained by fitting the EXAFS data.

| Sample     | Path | N       | R(Å)       | $\sigma^2$<br>( $\times 10^{-3} \text{Å}^2$ ) | $\Delta E_0$<br>(eV) | $S_0^2$ | R-factor<br>(%) |
|------------|------|---------|------------|-----------------------------------------------|----------------------|---------|-----------------|
| Fe-SA@NC-2 | Fe-N | 4.3±0.1 | 2.02±0.009 | 0.01                                          | 0.95±0.75            | 1.00    | 0.015           |

**Table S6.** Comparison of ORR performance of Fe-SA@NC-2 electrocatalyst with recent studies on alkaline ORR electrocatalyst (0.1 M KOH).

| Catalyst                    | Half potential<br>( $E_{1/2}$ , V<br>vs.RHE) | $J_k$<br>( $\text{mA}\cdot\text{cm}^{-2}$ ) | TOF<br>( $\text{s}^{-1}$ ) | MA<br>( $\text{A}\cdot\text{mg}^{-1}$ ) | Tafel<br>( $\text{mV}\cdot\text{dec}^{-1}$ ) | Ref.      |
|-----------------------------|----------------------------------------------|---------------------------------------------|----------------------------|-----------------------------------------|----------------------------------------------|-----------|
| Fe-SA@NC-1                  | 0.920                                        | 16.45<br>@0.90 V                            | 12.92                      | 4.98                                    | 47.6                                         | This work |
| Fe-SA@NC-2                  | <b>0.932</b>                                 | <b>28.38</b><br><b>@0.90 V</b>              | <b>14.71</b>               | <b>5.68</b>                             | <b>44.3</b>                                  | This work |
| Fe-SA@NC-3                  | 0.925                                        | 14.38<br>@0.90 V                            | 5.69                       | 2.19                                    | 46.1                                         | This work |
| Fe-N-C SAC-950              | 0.895                                        | 3.34<br>@0.90 V                             | 4.85                       | 1.87                                    | 64                                           | 1         |
| C-FeZ8@PDA-950              | 0.910                                        | 16.8<br>@0.85 V                             | 10.75                      | 4.15                                    | 71                                           | 2         |
| Fe-SAs/NSC-vd               | 0.920                                        | 32.7<br>@0.87 V                             | 18.59                      | 56.2                                    | 75.2                                         | 3         |
| Fe/N/C-MW                   | 0.900                                        | 4.61<br>@0.85 V                             | 0.76                       | 0.294                                   | 45                                           | 4         |
| Fe-NC                       | 0.890                                        | 4.87<br>@0.80 V                             | 3.41                       | 1.31                                    | 65                                           | 5         |
| Fe-N <sub>4</sub> @NC-PCSSs | 0.938                                        | 23.15<br>@0.90 V                            | 8.46                       | 3.26                                    | 49.5                                         | 6         |
| FeN <sub>x</sub> /NC-S      | 0.880                                        | 10.2<br>@0.90 V                             | 1.19                       | 0.46                                    | 61.3                                         | 7         |
| Fe-SNC                      | 0.920                                        | 40.80<br>@0.80 V                            | 25.2                       | 0.04                                    | 31                                           | 8         |
| P-O/FeNC-SAC                | 0.912                                        | 7.54<br>@0.90 V                             | 1.21                       | 2.38                                    | 68.7                                         | 9         |
| Fe-ISAS/CN                  | 0.881                                        | 6.92<br>@0.85 V                             | 3.25                       | 1.25                                    | 72                                           | 10        |
| Fe-N-C-900                  | 0.900                                        | 19.69<br>@0.85 V                            | 3.29                       | 1.27                                    | 83.6                                         | 11        |
| FeN <sub>4</sub> -O-NCR     | 0.942                                        | 39.56<br>@0.90 V                            | 38.39                      | 14.81                                   | 54.3                                         | 12        |
| meso-Fe-N-C                 | 0.846                                        | 4.69<br>@0.85 V                             | 1.04                       | 0.40                                    | -                                            | 13        |
| Fe SA/NPCs                  | 0.830                                        | 35.42<br>@0.85 V                            | 16.91                      | 6.52                                    | 65.3                                         | 14        |
| Fe <sub>SA</sub> -N-C       | 0.900                                        | 37.19<br>@0.85 V                            | 9.94                       | 3.84                                    | -                                            | 15        |
| SA-Fe-NHPC                  | 0.930                                        | 57.2<br>@0.85 V                             | 59.28                      | 22.88                                   | -                                            | 16        |

## References

1. R. Zheng, Q. Meng, H. Zhang, T. Li, D. Yang, L. Zhang, X. Jia, C. Liu, J. Zhu, X. Duan, M. Xiao and W. Xing, *J. Energy Chem.*, 2024, **90**, 7-15.
2. S. Zhou, C. Chen, J. Xia, L. Li, X. Qian, F. Yin, G. Dai, G. He, Q. Chen and H. Chen, *J. Mater. Sci. Technol.*, 2024, **181**, 82-90.

3. Y. Zhao, H.-C. Chen, X. Ma, J. Li, Q. Yuan, P. Zhang, M. Wang, J. Li, M. Li, S. Wang, H. Guo, R. Hu, K.-H. Tu, W. Zhu, X. Li, X. Yang and Y. Pan, *Adv. Mater.*, 2024, **36**, 2308243.
4. Y. Han, Q. Wei, Y. Fu, D. Zhang, P. Li, X. Shan, H. Yang, X. Zhan, X. Liu and W. Yang, *Small*, 2023, **19**, 2300683.
5. K. F. Tadavani, M. Zhiani, H. Gharibi and H. B. Dehkordi, *Energy Fuels*, 2023, **37**, 19092-19102.
6. C. Li, M. Yuan, Y. Liu, H. Lan, Y. Chen, Z. Li, K. Liu and L. Wang, *Chem. Eng. J.*, 2023, **477**, 146988.
7. L. Wu, R. Zhao, G. Du, H. Wang, M. Hou, W. Zhang, P. Sun and T. Chen, *Green Energy Environ.*, 2023, **8**, 1693-1702.
8. H. Liu, C. Wang, C. Liu, X. Zong, Y. Wang, X. Huang, Z. Hu and Z. Zhang, *ACS Appl. Mater. Inter.*, 2023, **15**, 29110-29119.
9. M. Liu, T. Sun, T. Peng, J. Wu, J. Li, S. Chen, L. Zhang, S. Li, J. Zhang and S. Sun, *ACS Energy Lett.*, 2023, **8**, 4531-4539.
10. S. Wei, R. Yang and Q. Zhang, *J. Mater. Chem. A*, 2023, **11**, 16314-16320.
11. L. Ma, J. Li, Z. Zhang, H. Yang, X. Mu, X. Gu, H. Jin, D. Chen, S. Yan, S. Liu and S. Mu, *Nano Res.*, 2022, **15**, 1966-1972.
12. L. Peng, J. Yang, Y. Yang, F. Qian, Q. Wang, D. Sun-Waterhouse, L. Shang, T. Zhang and G. I. N. Waterhouse, *Adv. Mater.*, 2022, **34**, 2202544.
13. Y. Zhou, Y. Yu, D. Ma, A. C. Foucher, L. Xiong, J. Zhang, E. A. Stach, Q. Yue and Y. Kang, *Acs Catalysis*, 2021, **11**, 74-81.
14. H. Yang, Z. Li, S. Kou, G. Lu and Z. Liu, *Appl. Catal. B*, 2020, **278**, 119270.
15. L. Jiao, R. Zhang, G. Wan, W. Yang, X. Wan, H. Zhou, J. Shui, S.-H. Yu and H.-L. Jiang, *Nat. Commun.*, 2020, **11**, 2831.
16. G. Chen, P. Liu, Z. Liao, F. Sun, Y. He, H. Zhong, T. Zhang, E. Zschech, M. Chen, G. Wu, J. Zhang and X. Feng, *Adv. Mater.*, 2020, **32**, 1907399.
